# Supplementary material
Source: MDPI journal article supplement (https://www.mdpi.com/2304-6775/7/3/59)
Supplement: s1 [file s1]

# Which are the Tools Available for Scholars? A Review of Assisting Software for the Peer Reviewing Process

## S1: Taxonomy and features of assisting software

|                   |                                          |                                                                                                  |
|-------------------|------------------------------------------|--------------------------------------------------------------------------------------------------|
| Pre-submission    | I. Identification & Social media         | 1.Link an author with a profile page                                                             |
|                   |                                          | 2.List the contributions (articles, projects, patents) associated with an author.                |
|                   |                                          | 3. Connect peers (p2p or publicly)                                                               |
|                   |                                          | 4. Connectivity with non-scholar social media                                                    |
|                   |                                          | 5. Endorsment of skills or abilities                                                             |
|                   |                                          | 6. Access to journal submission system                                                           |
|                   |                                          | 7. Discussion board and forums                                                                   |
|                   |                                          | 8. Career and job listings                                                                       |
|                   | II. Academic search engines              | 9. Access to scholar documents references                                                        |
|                   |                                          | 10. Boolean search                                                                               |
|                   |                                          | 11. Access abstract of scholarly documents                                                       |
|                   |                                          | 12. Full access to scholarly documents                                                           |
|                   |                                          | 13. Search refine based on date, subject, author or publication                                  |
|                   |                                          | 14. Sorting results based on a given criteria                                                    |
|                   |                                          | 15.Purchase content directly                                                                     |
|                   |                                          | 16. Alert based subscription for authors, topics or publications                                 |
|                   |                                          | 17. Search history                                                                               |
|                   |                                          | 18. Graph, tables and image based search                                                         |
|                   |                                          | 19. Bulk downloading of content                                                                  |
| During submission | III. Journal-Abstract matchers           | 20. Suggest journal for submission based on title and/or abstract                                |
|                   |                                          | 21. Compatibility score generation                                                               |
|                   |                                          | 22. Keyword input                                                                                |
|                   | IV. Collaborative text editors           | 23. Filter journal results based on language, publication type and open access licensing options |
|                   |                                          | 24.Text entry and formatting for document creation                                               |
|                   |                                          | 25. Asynchronous collaborative editing                                                           |
|                   |                                          | 26. Table and equation creation                                                                  |
|                   |                                          | 27. Management, editing and posting of visual materials                                          |
|                   |                                          | 28. Automatically managing cross-references                                                      |
|                   |                                          | 29. Basic spellchecking                                                                          |
|                   |                                          | 30. Automatic cross-referencing and indexing document items                                      |
|                   |                                          | 31. Document statistics tracking (word count, paragraphs, pages)                                 |
|                   |                                          | 32. Tracking changes & document version control                                                  |
|                   |                                          | 33. Non-printing comments and annotations                                                        |
|                   |                                          | 34. Synchronous collaborative editing                                                            |
|                   | V. Data visualization                    | 35. Generate charts based on input data                                                          |
|                   |                                          | 36. Figure generation based on templates and layouts images for publication                      |
|                   |                                          | 37. Export to file formats TIFF, EPS, JPG or PDF (images)                                        |
|                   |                                          | 38. Chart customization (scale, ticks, lines, labels, color scales)                              |
|                   |                                          | 39. Basic mathematical operations                                                                |
|                   |                                          | 40. Interpolation and extrapolation data functions                                               |
|                   |                                          | 41. Curve fitting and peak analysis                                                              |
|                   |                                          | 42.Multi-axis and multi-panel charts                                                             |
|                   |                                          | 43. Signal processing (transforms, smoothing and filtering)                                      |
|                   |                                          | 44. Batch processing of plots                                                                    |
|                   | VI. Reference management                 | 45. Manage information resources                                                                 |
|                   |                                          | 46. Citation or sources during document creation                                                 |
|                   |                                          | 47. Generate list of cited sources of information                                                |
|                   |                                          | 48. Share folders or documents with groups.                                                      |
|                   |                                          | 49. PDF annotation tools (notes, highlighting, shapes and underline the bibliographical sources) |
|                   |                                          | 50. Suggestion of documents, based on the file library.                                          |
| Post-submission   | VII. Proofreading & plagiarism detection | 51. Private digital storage of information sources                                               |
|                   |                                          | 52. Detection of possible grammatical, spelling and punctuation errors                           |
|                   |                                          | 53. Detection and highlight of wrongly cited fragments in documents                              |
|                   |                                          | 54. Cloud services integration                                                                   |
|                   |                                          | 55. Readability score evaluation                                                                 |
|                   |                                          | 56. Vocabulary suggestion                                                                        |
|                   |                                          | 57. Genre-specific writing style checks                                                          |
|                   |                                          | 58. Plagiarism report                                                                            |
|                   | VIII. Data archiving                     | 59. Online data backup                                                                           |
|                   |                                          | 60. Generation of a data persistent, unique and citable identifier                               |
|                   |                                          | 61. Funding agency reporting                                                                     |
|                   |                                          | 62. Privacy controls                                                                             |
|                   | X Scientometrics & Altimetrics           | 63. Integration of data submission system                                                        |
|                   |                                          | 64. Article view counting record                                                                 |
|                   |                                          | 65. Article citation count tracking                                                              |
|                   |                                          | 66. Journal Influence metric (Impact factor)                                                     |
|                   |                                          | 67. Journal ranking (quartile,etc)                                                               |
|                   |                                          | 68. Social media performance tracking                                                            |
|                   |                                          | 69. Article promotion campaign tools                                                             |
|                   |                                          | 70. Author promotion tools                                                                       |
